# Supplementary material for: Subsurface Microstructural Evolution during Scratch Testing on Bcc Iron
Source: MDPI journal article supplement (doi:10.3390/met11081258), 2021-08-10
Supplement: s1 [file s1]

Archive with 1 entries (1 files):
- metals-1309245-supplementary.pdf
